# Supplementary material for: A computational study of the intramolecular deprotonation of a carbon acid in aqueous solution
Source: Royal Society of Chemistry journal article supplement (doi:10.1039/b717524h), 2008-01-01
Supplement: b717524h.pdf [file b717524h.pdf]

## Supporting Information

Full reference 40:

Gaussian 03, Revision B.04, M. J. Frisch, G. W. Trucks, H. B. Schlegel, G. E. Scuseria, M. A. Robb, J. R. Cheeseman, J. A. Montgomery, Jr., T. Vreven, K. N. Kudin, J. C. Burant, J. M. Millam, S. S. Iyengar, J. Tomasi, V. Barone, B. Mennucci, M. Cossi, G. Scalmani, N. Rega, G. A. Petersson, H. Nakatsuji, M. Hada, M. Ehara, K. Toyota, R. Fukuda, J. Hasegawa, M. Ishida, T. Nakajima, Y. Honda, O. Kitao, H. Nakai, M. Klene, X. Li, J. E. Knox, H. P. Hratchian, J. B. Cross, V. Bakken, C. Adamo, J. Jaramillo, R. Gomperts, R. E. Stratmann, O. Yazyev, A. J. Austin, R. Cammi, C. Pomelli, J. W. Ochterski, P. Y. Ayala, K. Morokuma, G. A. Voth, P. Salvador, J. J. Dannenberg, V. G. Zakrzewski, S. Dapprich, A. D. Daniels, M. C. Strain, O. Farkas, D. K. Malick, A. D. Rabuck, K. Raghavachari, J. B. Foresman, J. V. Ortiz, Q. Cui, A. G. Baboul, S. Clifford, J. Cioslowski, B. B. Stefanov, G. Liu, A. Liashenko, P. Piskorz, I. Komaromi, R. L. Martin, D. J. Fox, T. Keith, M. A. Al-Laham, C. Y. Peng, A. Nanayakkara, M. Challacombe, P. M. W. Gill, B. Johnson, W. Chen, M. W. Wong, C. Gonzalez and J. A. Pople, Gaussian, Inc., Wallingford CT, 2004.

**Figure A – Geometric parameter definitions a) Bond length definitions, b) Torsional angle definitions.**

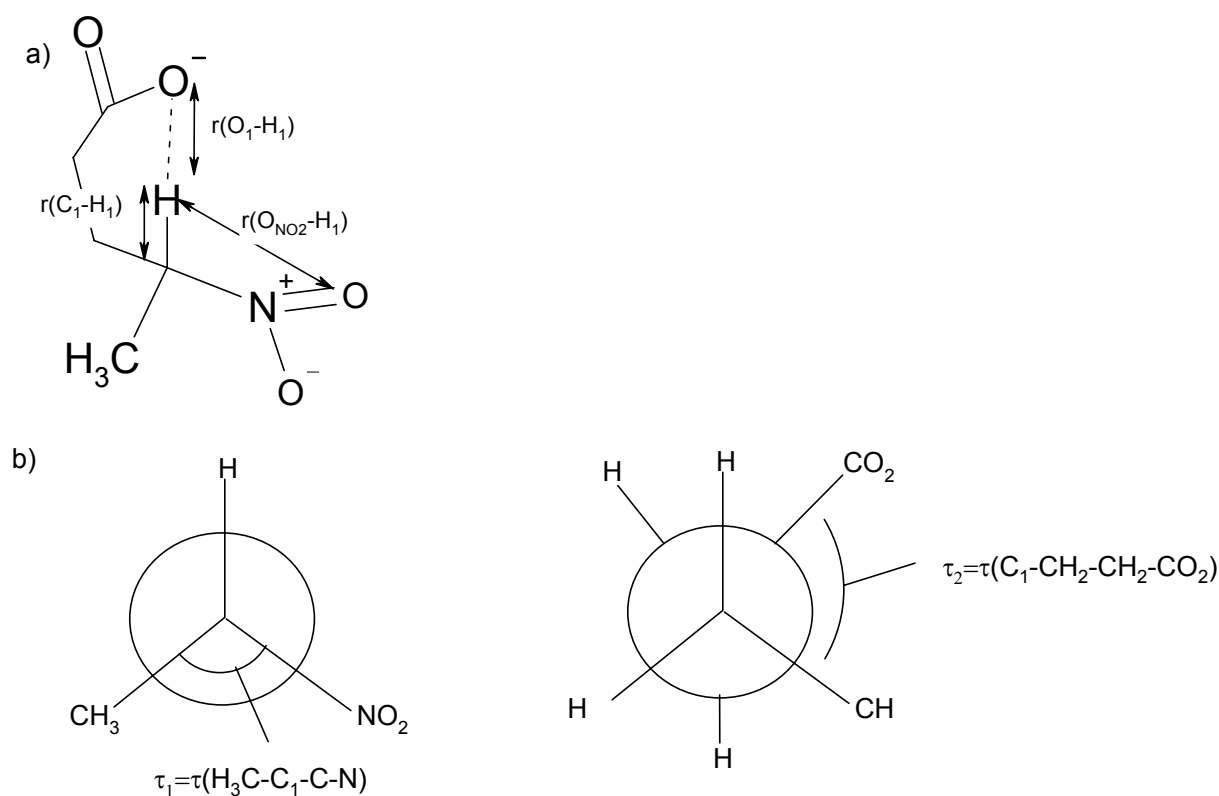

**Table A – Gas phase B3LYP/6-31+G(d,p) model (optimised) geometric information.**

|                                                 | CH-CHA | CH-HEX | TS1    | OH-HEX | TS2   | OH-OCT-NO2 | OH-CHA |
|-------------------------------------------------|--------|--------|--------|--------|-------|------------|--------|
| $r(\text{O}_1\text{-H}_1)/\text{Å}$             | 4.51   | 2.17   | 1.18   | 1.03   | 0.98  | 1.11       | -      |
| $r(\text{C}_1\text{-H}_1)/\text{Å}$             | 1.09   | 1.09   | 1.44   | 1.75   | 2.17  | 2.61       | -      |
| rc                                              | -3.41  | -1.08  | 0.26   | 0.71   | 1.18  | 1.50       | -      |
| $r(\text{O}_{\text{NO}_2}\text{-H}_1)/\text{Å}$ | 2.36   | 2.10   | 2.94   | 2.51   | 2.38  | 1.33       | -      |
| $r(\text{C}_1\text{-O}_1)/\text{Å}$             | 4.51   | 2.89   | 2.58   | 2.73   | 3.03  | 3.35       | -      |
| $\tau 1/^\circ$                                 | -122.0 | -123.6 | -136.0 | -144.2 | 156.9 | -175.5     | -      |
| $\tau 2/^\circ$                                 | 167.1  | 56.0   | 50.3   | 56.6   | 67.6  | 76.2       | -      |

**Table B – PCM B3LYP/6-31+G(d,p) model (optimised) geometric information.**

|                                                 | CH-CHA  | CH-HEX | TS1    | OH-HEX | TS2    | N-OCT-NO2 | OH-CHA |
|-------------------------------------------------|---------|--------|--------|--------|--------|-----------|--------|
| $r(\text{O}_1\text{-H}_1)/\text{Å}$             | 4.43    | 2.67   | 1.32   | 0.99   | 0.98   | 1.43      | 0.97   |
| $r(\text{C}_1\text{-H}_1)/\text{Å}$             | 1.09    | 1.09   | 1.34   | 1.97   | 2.18   | 2.47      | 4.87   |
| rc                                              | -3.34   | -1.58  | 0.02   | 0.97   | 1.20   | 1.04      | 3.90   |
| $r(\text{O}_{\text{NO}_2}\text{-H}_1)/\text{Å}$ | 2.37    | 2.37   | 2.81   | 2.90   | 2.44   | 1.06      | 5.10   |
| $r(\text{C}_1\text{-O}_1)/\text{Å}$             | -122.07 | 3.26   | 2.60   | 2.88   | 3.05   | 3.27      | 4.96   |
| $\tau 1/^\circ$                                 | -122.8  | -121.3 | -135.3 | -163.3 | -170.7 | -178.1    | -179.1 |
| $\tau 2/^\circ$                                 | 164.8   | 65.7   | 52.1   | 63.3   | 69.6   | 73.5      | 179.8  |

**Table C – QM/MM B3LYP/6-31+G(d,p) (geometric) information.**

|                                                 | CH-CHA | CH-HEX | TS1    | OH-HEX | TS2    | OH-OCT-NO2 | OH-CHA |
|-------------------------------------------------|--------|--------|--------|--------|--------|------------|--------|
| $r(\text{O}_1\text{-H}_1)/\text{Å}$             | 4.59   | 2.36   | 1.19   | 1.00   | 0.98   | 1.08       | 0.97   |
| $r(\text{C}_1\text{-H}_1)/\text{Å}$             | 1.09   | 1.09   | 1.41   | 1.93   | 2.61   | 2.58       | 4.91   |
| rc                                              | -3.50  | -1.27  | 0.22   | 0.92   | 1.62   | 1.50       | 3.94   |
| $r(\text{O}_{\text{NO}_2}\text{-H}_1)/\text{Å}$ | 2.39   | 2.40   | 2.21   | 2.38   | 2.30   | 1.39       | 5.03   |
| $r(\text{C}_1\text{-O}_1)/\text{Å}$             | 4.28   | 2.78   | 2.56   | 2.84   | 2.97   | 3.30       | 4.99   |
| $\tau 1/^\circ$                                 | -122.7 | -121.4 | -139.6 | -156.4 | -165.2 | -177.3     | -175.6 |
| $\tau 2/^\circ$                                 | 170.2  | 58.9   | 49.6   | 64.6   | 67.5   | 71.2       | 167.1  |

**Table D – Gas phase AM1-SRP model (optimised) geometric information.**

|                                                     | CH-CHA | CH-HEX | TS1    | OH-<br>HEX | TS2   | OH-OCT-<br>NO2 | OH-<br>CHA |
|-----------------------------------------------------|--------|--------|--------|------------|-------|----------------|------------|
| $r(\text{O}_1\text{-H}_1)/\text{\AA}$               | 4.50   | 2.63   | 1.30   | -          | 0.98  | 0.97           | -          |
| $r(\text{C}_1\text{-H}_1)/\text{\AA}$               | 1.10   | 1.10   | 1.35   | -          | 2.06  | 3.31           | -          |
| rc                                                  | -3.40  | -1.53  | 0.05   | -          | 1.08  | 2.34           | -          |
| $r(\text{O}_{\text{NO}_2^-}\text{-H}_1)/\text{\AA}$ | 2.41   | 2.66   | 2.71   | -          | 3.24  | 2.09           | -          |
| $r(\text{C}_1\text{-O}_1)/\text{\AA}$               | 4.24   | 2.66   | 2.60   | -          | 2.92  | 3.98           | -          |
| $\tau 1/^\circ$                                     | -119.1 | -118.2 | -136.1 | -          | 158.1 | -178.2         | -          |
| $\tau 2/^\circ$                                     | 170.6  | 53.6   | 52.0   | -          | 65.1  | 135.4          | -          |

**Table E – QM/MM AM1-SRP (optimised) geometric information.**

|                                                     | CH-CHA | CH-HEX | TS1    | OH-<br>HEX | TS2    | OH-OCT-<br>NO2 | OH-<br>CHA |
|-----------------------------------------------------|--------|--------|--------|------------|--------|----------------|------------|
| $r(\text{O}_1\text{-H}_1)/\text{\AA}$               | 4.51   | 2.38   | 1.28   | 1.40       | 1.04   | 0.97           | 0.97       |
| $r(\text{C}_1\text{-H}_1)/\text{\AA}$               | 1.10   | 1.10   | 1.31   | 1.96       | 2.79   | 2.91           | 4.82       |
| rc                                                  | -3.42  | -1.28  | 0.02   | 0.56       | 1.74   | 1.94           | 3.85       |
| $r(\text{O}_{\text{NO}_2^-}\text{-H}_1)/\text{\AA}$ | 2.50   | 2.54   | 2.83   | 3.05       | 2.28   | 2.04           | 5.17       |
| $r(\text{C}_1\text{-O}_1)/\text{\AA}$               | 4.23   | 2.98   | 2.50   | 3.06       | 3.45   | 3.49           | 4.94       |
| $\tau 1/^\circ$                                     | -118.6 | -118.7 | -125.0 | -177.4     | -179.0 | -179.7         | -179.8     |
| $\tau 2/^\circ$                                     | 170.1  | 61.7   | 52.1   | 72.3       | 85.8   | 78.2           | 176.5      |

**Table F** Total charge and total spin are followed by the Cartesian co-ordinates (Å) of the B3LYP/6-31+G(d,p) *in vacuo* optimised stationary points.

CH-CHA:

-1 1  
8 2.627170 -0.877913 -1.215868  
6 2.741439 -0.370918 -0.070338  
8 3.778665 -0.081754 0.579529  
6 1.395674 -0.084661 0.702243  
6 0.178411 0.067105 -0.215138  
6 -1.154148 0.027012 0.556008  
1 -1.250597 -0.927867 1.077400  
7 -2.299531 -0.011316 -0.447670  
8 -2.852794 -1.096437 -0.645988  
8 -2.599642 1.031773 -1.031903  
6 -1.376151 1.198556 1.509848  
1 -2.362027 1.149663 1.985553  
1 -0.612651 1.161050 2.290724  
1 -1.287897 2.150842 0.980696  
1 0.236234 1.008493 -0.774423  
1 0.211990 -0.744068 -0.949289  
1 1.550726 0.799266 1.329916  
1 1.246652 -0.935870 1.384664

CH-HEX:

-1 1  
8 2.179348 0.151200 0.619186  
6 1.750162 -0.593223 1.547536  
8 2.405573 -1.269389 2.378110  
6 0.193684 -0.723684 1.692610  
6 -0.680794 0.182516 0.809935  
6 -0.390510 0.042565 -0.698781  
1 0.612007 0.452279 -0.856211  
7 -1.338706 0.978602 -1.437461  
8 -2.214937 0.500355 -2.166653  
8 -1.192275 2.189664 -1.260331  
6 -0.501167 -1.370728 -1.248162  
1 -0.382277 -1.383683 -2.335047  
1 0.303064 -1.965337 -0.808289  
1 -1.463043 -1.832613 -1.003790  
1 -1.743574 -0.044164 0.988204  
1 -0.513534 1.229598 1.078566  
1 -0.050068 -0.518676 2.742639  
1 -0.062612 -1.779816 1.536700

TS1:

-1 1

|   |           |           |           |
|---|-----------|-----------|-----------|
| 8 | 1.867387  | -0.019174 | 0.181947  |
| 6 | 1.652970  | -0.405963 | 1.418418  |
| 8 | 2.532145  | -0.482680 | 2.276951  |
| 6 | 0.207072  | -0.825616 | 1.746303  |
| 6 | -0.885334 | -0.111266 | 0.922648  |
| 6 | -0.591127 | -0.164675 | -0.574848 |
| 1 | 0.824584  | 0.003442  | -0.369537 |
| 7 | -1.076477 | 0.940924  | -1.316807 |
| 8 | -1.279036 | 0.802894  | -2.552936 |
| 8 | -1.245843 | 2.055764  | -0.756713 |
| 6 | -0.818936 | -1.498690 | -1.259475 |
| 1 | -0.372148 | -1.522232 | -2.255854 |
| 1 | -0.363565 | -2.297419 | -0.662477 |
| 1 | -1.890855 | -1.733094 | -1.373542 |
| 1 | -1.866341 | -0.563168 | 1.155974  |
| 1 | -0.936925 | 0.938078  | 1.221060  |
| 1 | 0.056421  | -0.669534 | 2.818679  |
| 1 | 0.159873  | -1.912270 | 1.583833  |

OH-HEX:

-1 1

|   |           |           |           |
|---|-----------|-----------|-----------|
| 8 | 1.916338  | 0.029837  | 0.213026  |
| 6 | 1.654469  | -0.374130 | 1.456630  |
| 8 | 2.523047  | -0.416226 | 2.316248  |
| 6 | 0.218652  | -0.828926 | 1.725122  |
| 6 | -0.879631 | -0.103772 | 0.915293  |
| 6 | -0.685298 | -0.185170 | -0.586277 |
| 1 | 1.029375  | 0.034983  | -0.319767 |
| 7 | -1.092237 | 0.914966  | -1.321428 |
| 8 | -1.293934 | 0.783744  | -2.570315 |
| 8 | -1.230266 | 2.052713  | -0.768755 |
| 6 | -0.878188 | -1.520618 | -1.263522 |
| 1 | -0.408546 | -1.545995 | -2.250056 |
| 1 | -0.438727 | -2.320782 | -0.654534 |
| 1 | -1.945735 | -1.766521 | -1.412851 |
| 1 | -1.853604 | -0.536893 | 1.216105  |
| 1 | -0.906448 | 0.951323  | 1.196742  |
| 1 | 0.047718  | -0.725744 | 2.801021  |
| 1 | 0.196878  | -1.907469 | 1.510942  |

TS2:

-1 1

|   |           |           |           |
|---|-----------|-----------|-----------|
| 8 | 1.794571  | 0.437049  | 0.359772  |
| 6 | 1.553760  | -0.287918 | 1.461456  |
| 8 | 2.443396  | -0.484327 | 2.272642  |
| 6 | 0.156479  | -0.877772 | 1.636967  |
| 6 | -1.015827 | -0.180390 | 0.907729  |
| 6 | -0.989466 | -0.279052 | -0.594954 |
| 1 | 0.979968  | 0.523481  | -0.186171 |
| 7 | -1.042525 | 0.852649  | -1.337436 |
| 8 | -1.315175 | 0.777008  | -2.587112 |
| 8 | -0.781204 | 2.001324  | -0.804587 |
| 6 | -1.354824 | -1.568137 | -1.271153 |
| 1 | -0.817372 | -1.697121 | -2.216236 |
| 1 | -1.119554 | -2.419781 | -0.618862 |
| 1 | -2.430581 | -1.626455 | -1.517918 |
| 1 | -1.940364 | -0.648239 | 1.296228  |
| 1 | -1.053462 | 0.876497  | 1.185760  |
| 1 | -0.018945 | -0.914537 | 2.718082  |
| 1 | 0.229382  | -1.923624 | 1.305820  |

OH-OCT-NO<sub>2</sub>:

-1 1

|   |           |           |           |
|---|-----------|-----------|-----------|
| 8 | 1.632116  | 1.010758  | 0.699958  |
| 6 | 1.576747  | -0.040259 | 1.477157  |
| 8 | 2.529000  | -0.401789 | 2.171488  |
| 6 | 0.280895  | -0.871088 | 1.551083  |
| 6 | -1.010297 | -0.330269 | 0.895555  |
| 6 | -1.100578 | -0.424623 | -0.602396 |
| 1 | 0.772189  | 1.266525  | 0.048551  |
| 7 | -0.750463 | 0.602583  | -1.360605 |
| 8 | -0.937386 | 0.620597  | -2.623683 |
| 8 | -0.180890 | 1.672996  | -0.791397 |
| 6 | -1.674575 | -1.625773 | -1.291951 |
| 1 | -1.059930 | -1.920405 | -2.150915 |
| 1 | -1.740445 | -2.469508 | -0.595127 |
| 1 | -2.682481 | -1.432154 | -1.692939 |
| 1 | -1.844218 | -0.913932 | 1.313939  |
| 1 | -1.166860 | 0.710027  | 1.203148  |
| 1 | 0.109656  | -1.035602 | 2.622567  |
| 1 | 0.525776  | -1.857430 | 1.135595  |

OH-CHA:

-1 1

|   |           |           |           |
|---|-----------|-----------|-----------|
| 8 | 3.188257  | -0.795942 | 1.002479  |
| 6 | 2.106619  | -0.637640 | 0.432745  |
| 8 | 1.508639  | -1.600280 | -0.221053 |
| 6 | 1.458480  | 0.758789  | 0.502662  |
| 6 | 0.236417  | 1.077855  | -0.388485 |
| 6 | -1.084815 | 0.503875  | 0.042546  |
| 1 | 0.509326  | -1.430209 | -0.670245 |
| 7 | -1.511398 | -0.645017 | -0.458151 |
| 8 | -2.681215 | -1.103153 | -0.229553 |
| 8 | -0.694376 | -1.362215 | -1.240640 |
| 6 | -2.009885 | 1.239440  | 0.964971  |
| 1 | -2.426086 | 0.568276  | 1.725642  |
| 1 | -1.478175 | 2.057755  | 1.464446  |
| 1 | -2.874556 | 1.666852  | 0.432145  |
| 1 | 0.132396  | 2.173389  | -0.399961 |
| 1 | 0.446567  | 0.769430  | -1.419042 |
| 1 | 2.271679  | 1.461005  | 0.278940  |
| 1 | 1.204999  | 0.925870  | 1.557802  |

**Table G** Total charge and total spin followed by the cartesian co-ordinates (Å) of the B3LYP/6-31+G(d,p) PCM optimised stationary points.

CH-CHA:

-1 1

|   |           |           |           |
|---|-----------|-----------|-----------|
| 8 | 2.714197  | -0.426979 | -1.317886 |
| 6 | 2.727868  | -0.300307 | -0.059985 |
| 8 | 3.764935  | -0.297757 | 0.671401  |
| 6 | 1.383337  | -0.147206 | 0.688438  |
| 6 | 0.156363  | 0.008253  | -0.214399 |
| 6 | -1.158233 | 0.032803  | 0.591219  |
| 1 | -1.268989 | -0.891645 | 1.160675  |
| 7 | -2.295578 | -0.045670 | -0.422243 |
| 8 | -2.815081 | -1.146278 | -0.620791 |
| 8 | -2.620027 | 0.978638  | -1.023600 |
| 6 | -1.352721 | 1.256277  | 1.480170  |
| 1 | -2.346875 | 1.259128  | 1.935472  |
| 1 | -0.615942 | 1.223990  | 2.286255  |
| 1 | -1.214667 | 2.182303  | 0.917141  |
| 1 | 0.230951  | 0.930093  | -0.800795 |
| 1 | 0.124760  | -0.826477 | -0.920815 |
| 1 | 1.485536  | 0.706163  | 1.366811  |
| 1 | 1.271690  | -1.032371 | 1.328899  |

CH-HEX:

-1 1

|   |           |           |           |
|---|-----------|-----------|-----------|
| 8 | 2.038088  | 0.807423  | 1.323030  |
| 6 | 1.724441  | -0.359906 | 1.697074  |
| 8 | 2.531207  | -1.238373 | 2.130147  |
| 6 | 0.231939  | -0.760479 | 1.673968  |
| 6 | -0.686210 | 0.088732  | 0.786654  |
| 6 | -0.362122 | -0.041940 | -0.714337 |
| 1 | 0.656243  | 0.296350  | -0.904398 |
| 7 | -1.218841 | 0.985397  | -1.445879 |
| 8 | -2.421823 | 0.757050  | -1.579807 |
| 8 | -0.672708 | 2.014490  | -1.849111 |
| 6 | -0.618586 | -1.421699 | -1.314343 |
| 1 | -0.470509 | -1.413698 | -2.397801 |
| 1 | 0.095358  | -2.129583 | -0.886745 |
| 1 | -1.630458 | -1.770312 | -1.093786 |
| 1 | -1.728306 | -0.209530 | 0.947081  |
| 1 | -0.586697 | 1.139632  | 1.075067  |
| 1 | -0.127971 | -0.674797 | 2.707788  |
| 1 | 0.157296  | -1.823292 | 1.424159  |

TS1:

-1 1

|   |           |           |           |
|---|-----------|-----------|-----------|
| 6 | -0.880675 | -1.515182 | -1.274918 |
| 6 | -0.630330 | -0.196991 | -0.568617 |
| 6 | -0.907644 | -0.154261 | 0.936144  |
| 6 | 0.222420  | -0.824928 | 1.747153  |
| 6 | 1.627856  | -0.338744 | 1.394562  |
| 8 | 1.823059  | 0.018056  | 0.145007  |
| 7 | -1.016277 | 0.937293  | -1.294856 |
| 8 | -1.217435 | 0.841033  | -2.541602 |
| 8 | -1.089257 | 2.072744  | -0.736066 |
| 8 | 2.535614  | -0.320159 | 2.235195  |
| 1 | 0.753276  | -0.025263 | -0.398038 |
| 1 | -0.373009 | -1.569340 | -2.240485 |
| 1 | -0.507717 | -2.334463 | -0.652662 |
| 1 | -1.952492 | -1.688310 | -1.446657 |
| 1 | -1.856140 | -0.660658 | 1.164593  |
| 1 | -1.006942 | 0.885535  | 1.251456  |
| 1 | 0.069172  | -0.677557 | 2.818713  |
| 1 | 0.221934  | -1.910424 | 1.578750  |



OH-HEX:

-1 1

|   |           |           |           |
|---|-----------|-----------|-----------|
| 8 | 1.900993  | 0.161340  | 0.190829  |
| 6 | 1.637218  | -0.258300 | 1.442714  |
| 8 | 2.509713  | -0.180264 | 2.294199  |
| 6 | 0.262234  | -0.846960 | 1.692806  |
| 6 | -0.910587 | -0.159470 | 0.952174  |
| 6 | -0.849930 | -0.235361 | -0.556364 |
| 1 | 1.081415  | 0.079934  | -0.361966 |
| 7 | -0.999401 | 0.881036  | -1.281198 |
| 8 | -1.132804 | 0.803899  | -2.571835 |
| 8 | -1.004957 | 2.065184  | -0.739678 |
| 6 | -0.998908 | -1.556233 | -1.261451 |
| 1 | -0.303993 | -1.664181 | -2.100252 |
| 1 | -0.819123 | -2.377517 | -0.561799 |
| 1 | -2.012070 | -1.680680 | -1.670263 |
| 1 | -1.830256 | -0.653128 | 1.299792  |
| 1 | -0.971922 | 0.885871  | 1.256967  |
| 1 | 0.092551  | -0.823970 | 2.771517  |
| 1 | 0.323690  | -1.905879 | 1.407431  |

TS2:

-1 1

|   |           |           |           |
|---|-----------|-----------|-----------|
| 8 | 1.772807  | 0.411913  | 0.284732  |
| 6 | 1.537096  | -0.266658 | 1.424169  |
| 8 | 2.441538  | -0.379504 | 2.236681  |
| 6 | 0.167499  | -0.890534 | 1.615656  |
| 6 | -1.034881 | -0.184782 | 0.943497  |
| 6 | -1.074438 | -0.259776 | -0.563020 |
| 1 | 0.966622  | 0.454501  | -0.268813 |
| 7 | -1.049835 | 0.849456  | -1.296072 |
| 8 | -1.234053 | 0.790906  | -2.586146 |
| 8 | -0.824855 | 2.030035  | -0.766007 |
| 6 | -1.350095 | -1.563720 | -1.253959 |
| 1 | -0.644774 | -1.756564 | -2.069660 |
| 1 | -1.283295 | -2.389509 | -0.539679 |
| 1 | -2.356543 | -1.581413 | -1.694688 |
| 1 | -1.934528 | -0.680201 | 1.335404  |
| 1 | -1.079027 | 0.858303  | 1.260811  |
| 1 | 0.007143  | -0.958101 | 2.694702  |
| 1 | 0.251872  | -1.923698 | 1.252427  |

OH-OCT-NO<sub>2</sub>:

-1 1

|   |           |           |           |
|---|-----------|-----------|-----------|
| 8 | 1.585809  | 0.957587  | 0.726007  |
| 6 | 1.564493  | -0.129367 | 1.411694  |
| 8 | 2.572711  | -0.603578 | 1.986438  |
| 6 | 0.244680  | -0.901694 | 1.565531  |
| 6 | -1.018943 | -0.294138 | 0.920837  |
| 6 | -1.086005 | -0.392076 | -0.580031 |
| 1 | 0.521094  | 1.423369  | -0.103715 |
| 7 | -0.749658 | 0.610186  | -1.348892 |
| 8 | -0.869662 | 0.650897  | -2.625424 |
| 8 | -0.219540 | 1.760905  | -0.777763 |
| 6 | -1.582927 | -1.634478 | -1.254191 |
| 1 | -0.931780 | -1.920659 | -2.086068 |
| 1 | -1.632941 | -2.456768 | -0.537105 |
| 1 | -2.587403 | -1.480745 | -1.669773 |
| 1 | -1.882691 | -0.845741 | 1.309772  |
| 1 | -1.136345 | 0.744557  | 1.240432  |
| 1 | 0.071318  | -1.010059 | 2.642401  |
| 1 | 0.416043  | -1.917543 | 1.189881  |

OH-CHA:

-1 1

|   |           |           |           |
|---|-----------|-----------|-----------|
| 8 | 2.810818  | 0.479310  | -1.235998 |
| 6 | 2.437487  | -0.162917 | -0.271449 |
| 8 | 3.351646  | -0.911814 | 0.395292  |
| 6 | 1.024049  | -0.212467 | 0.262658  |
| 6 | 0.045024  | 0.727434  | -0.462880 |
| 6 | -1.348422 | 0.655253  | 0.098834  |
| 1 | 2.948554  | -1.381584 | 1.144120  |
| 7 | -2.109814 | -0.371132 | -0.227668 |
| 8 | -3.338953 | -0.475081 | 0.226830  |
| 8 | -1.668323 | -1.324390 | -1.019374 |
| 6 | -1.895205 | 1.696538  | 1.031410  |
| 1 | -2.206141 | 1.265556  | 1.992066  |
| 1 | -1.136381 | 2.458761  | 1.228774  |
| 1 | -2.780461 | 2.195967  | 0.615702  |
| 1 | 0.407408  | 1.756893  | -0.381102 |
| 1 | 0.035646  | 0.464477  | -1.525805 |
| 1 | 1.057762  | 0.013778  | 1.336000  |
| 1 | 0.668174  | -1.246506 | 0.169841  |
